# Supplementary material for: Gene expression profiling of peripheral blood cells for early detection of breast cancer
Source: PubMed Central journal article supplement (PMC2880427; doi:10.1186/bcr2472), 2010-01-15

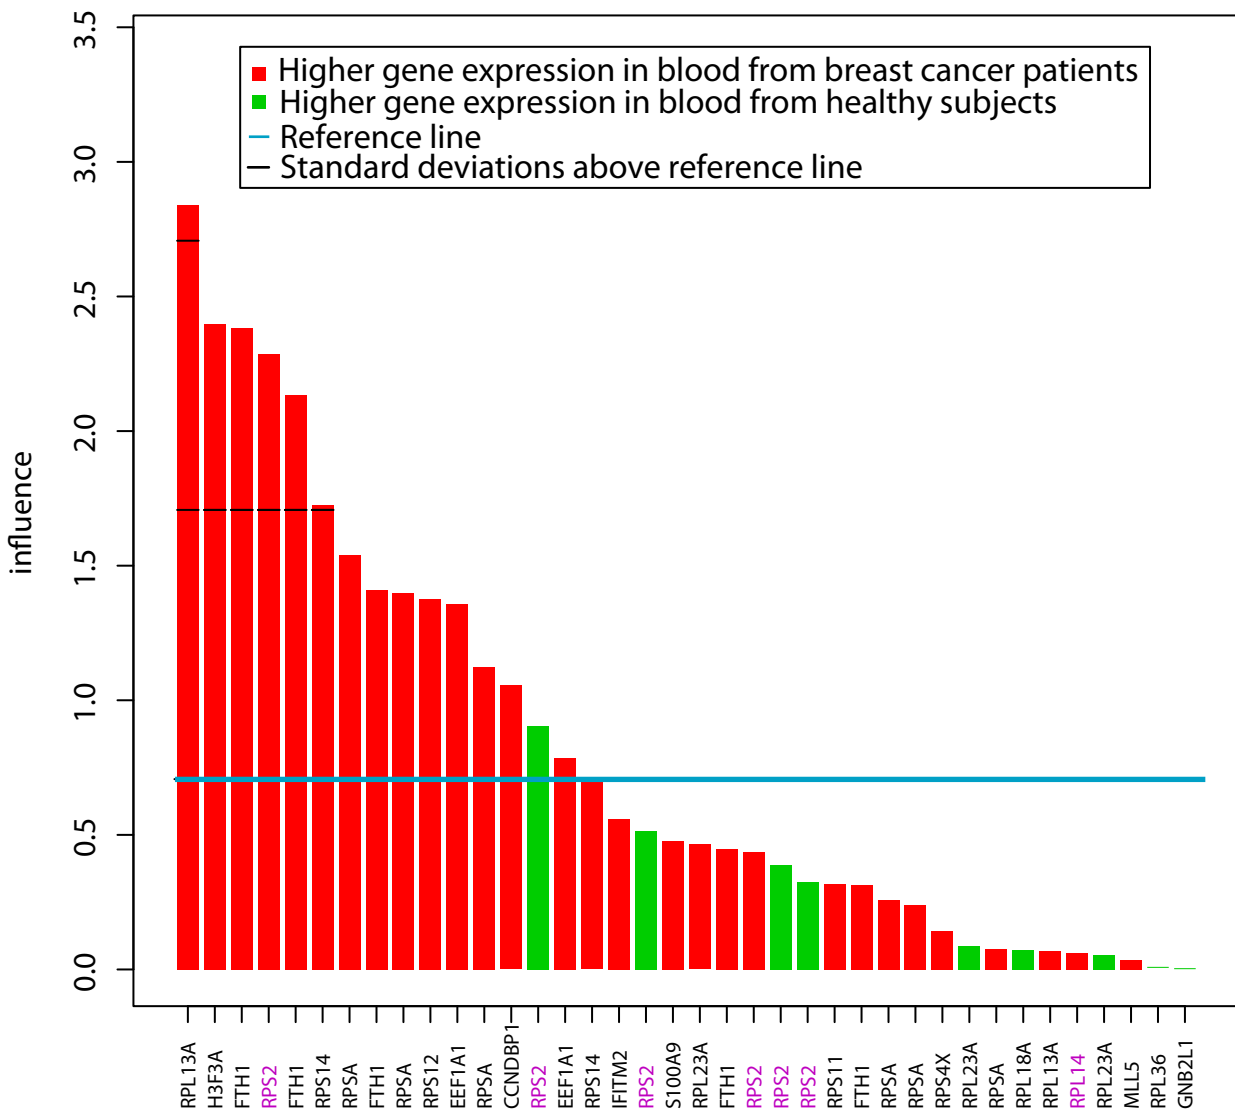

Supplement: bcr2472-S7.pdf [file bcr2472-S7.pdf]
